# Supplementary material for: Widespread Non-Canonical Epigenetic Modifications in MMTV-NeuT Breast Cancer
Source: PubMed Central journal article supplement — Neoplasia. 2015 Apr 26;17(4):348–57. doi: 10.1016/j.neo.2015.02.006 (PMC4415121; doi:10.1016/j.neo.2015.02.006), 2015-04-26
Supplement: mmc1.pdf [file mmc1.pdf]

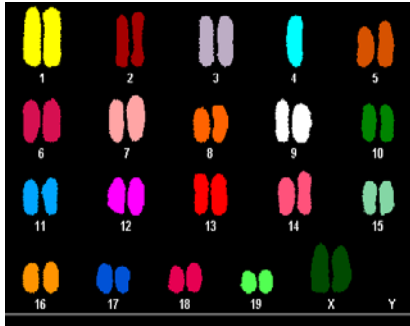

**Chromosome 4  
Deletions**

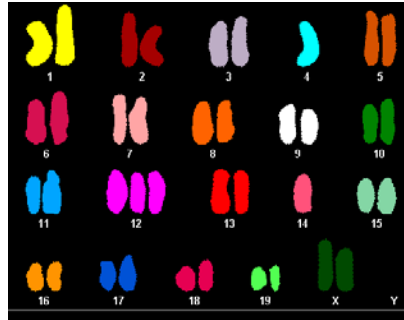

**Chromosomal Deletions,  
Duplications, Translocations**

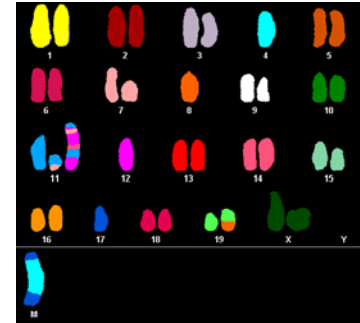

**Translocations**

Supplemental Figure 1

**Supplemental Figure 1. Genomic instability of spontaneous breast tumors in heterozygous mice. A:** Chromosomes of primary cells from FVB X BALB-NeuT F1 tumors were examined using SKY. The complement of Chromosome 4 was altered in 100/100 tumor cells examined. Additional gains, losses and translocations were observed at other chromosomes, primarily at Chr 1 and 12.

**Supplemental Table 1.** Significant Loss of Heterozygosity on each Chromosome in Spontaneous Breast Tumors. Z-scores were calculated from the raw allele intensities of the genotyping data, and absolute values of SNP probes are summarized chromosome-by-chromosome for F1 tumor and normal samples.

| Chr | Normal tissue or Tumor | N  | Median $\Sigma(\text{abs value})$ zscores/ N probes | Fold-Increase of Tumor Over Normal | Rank Sum P Value (N vs T) |
|-----|------------------------|----|-----------------------------------------------------|------------------------------------|---------------------------|
| 1   | N                      | 7  | 0.736                                               |                                    | <.001                     |
| 1   | T                      | 21 | 2.32                                                | <b>3.2</b>                         |                           |
| 2   | N                      | 7  | 0.801                                               |                                    | <.001                     |
| 2   | T                      | 21 | 1.59                                                | <b>2.0</b>                         |                           |
| 3   | N                      | 7  | 0.758                                               |                                    | <.001                     |
| 3   | T                      | 21 | 1.56                                                | <b>2.1</b>                         |                           |
| 4   | N                      | 7  | 0.786                                               |                                    | <.001                     |
| 4   | T                      | 21 | 7.18                                                | <b>9.1</b>                         |                           |
| 5   | N                      | 7  | 0.797                                               |                                    | <.001                     |
| 5   | T                      | 21 | 1.51                                                | <b>1.9</b>                         |                           |
| 6   | N                      | 7  | .767                                                |                                    | <.001                     |
| 6   | T                      | 21 | 1.65                                                | <b>2.2</b>                         |                           |
| 7   | N                      | 7  | 0.790                                               |                                    | <.001                     |
| 7   | T                      | 21 | 1.67                                                | <b>2.1</b>                         |                           |
| 8   | N                      | 7  | 0.761                                               |                                    | <.001                     |
| 8   | T                      | 21 | 2.06                                                | <b>2.7</b>                         |                           |
| 9   | N                      | 7  | 0.793                                               |                                    | <.001                     |
| 9   | T                      | 21 | 1.75                                                | <b>2.2</b>                         |                           |
| 10  | N                      | 7  | 0.773                                               |                                    | <.001                     |
| 10  | T                      | 21 | 1.44                                                | <b>1.9</b>                         |                           |
| 11  | N                      | 7  | 0.859                                               |                                    | <.001                     |

|    |   |    |        |            |       |
|----|---|----|--------|------------|-------|
| 11 | T | 21 | 1.81   | <b>2.1</b> |       |
| 12 | N | 7  | 0.786  |            | <.001 |
| 12 | T | 21 | 1.70   | <b>2.2</b> |       |
| 13 | N | 7  | 0.8.09 |            | <.001 |
| 13 | T | 21 | 1.69   | <b>2.1</b> |       |
| 14 | N | 7  | 0.790  |            | <.001 |
| 14 | T | 21 | 1.51   | <b>1.9</b> |       |
| 15 | N | 7  | 0..794 |            | <.001 |
| 15 | T | 21 | 1.76   | <b>2.2</b> |       |
| 16 | N | 7  | 0.859  |            | <.001 |
| 16 | T | 21 | 1.90   | <b>2.2</b> |       |
| 17 | N | 7  | 0.731  |            | <.001 |
| 17 | T | 21 | 1.48   | <b>2.0</b> |       |
| 18 | N | 7  | 0.765  |            | <.001 |
| 18 | T | 21 | 1.31   | <b>1.7</b> |       |
| 19 | N | 7  | 0.759  |            | <.001 |
| 19 | T | 21 | 2.04   | <b>2.7</b> |       |
| X  | N | 7  | 0.756  |            | <.001 |
| X  | T | 21 | 1.44   | <b>1.9</b> |       |

**Supplemental Table 2.** Analyzing genotype data for selection – i.e., a quantitative measurement toward one allele reveals significant loss of BALB/c alleles on chromosome 4. Locus-by-locus analysis used the positive (gain of BALB/c) or negative (loss of BALB/c) Z-scores calculated before. Only probes on chromosome 4 were significantly skewed in 3 of 3 arrays.

| Chr | N                      | Median<br>$\sum$ zscores/<br>N probes | Rank<br>Sum<br>P<br>Value |
|-----|------------------------|---------------------------------------|---------------------------|
| 4   | Normal, 7<br>Tumor, 21 | .0482<br>-6.67                        | 0.006                     |
